# Supplementary material for: Cu2O nanoparticles anchored on carbon for the efficient removal of propofol from operating room wastewater via peroxymonosulfate activation: efficiency, mechanism, and pathway
Source: Royal Society of Chemistry journal article supplement (doi:10.1039/d1ra03049c), 2021-01-01
Supplement: d1ra03049c1.pdf [file d1ra03049c1.pdf]

Supplementary materials for

**Cu<sub>2</sub>O nanoparticles anchored on carbon for efficient removal of propofol from operating room wastewater via peroxymonosulfate activation: The efficiency, mechanism, and pathway**

*Yujie Tang<sup>a\*</sup>, Shiyin Zhao<sup>b</sup>, Zemin Peng<sup>a</sup>, Zhen Li<sup>a</sup>, Liang Chen<sup>a</sup>, Pei Gan<sup>a\*</sup>*

*<sup>a</sup> Hunan provincial maternal and child health care hospital, Changsha 410008, P.R. China.*

*<sup>b</sup> Faculty of Health Sciences, University of Macau, Macau SAR 999078, P.R. China.*

\* To whom correspondence should be addressed.

Emails: [tangyujie0202@163.com](mailto:tangyujie0202@163.com), [hnsfybjymz@yahoo.com](mailto:hnsfybjymz@yahoo.com)

This profile contains 6 pages: Figure S1-S5.

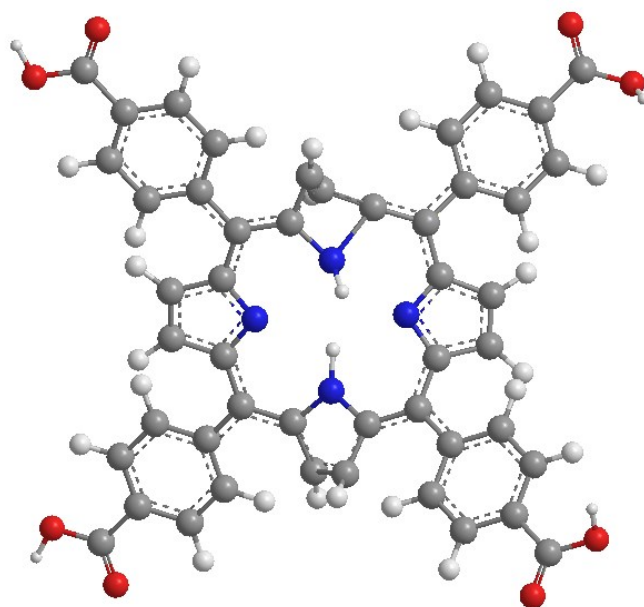

**Figure S1.** The 3D structure of the TCPP molecule.

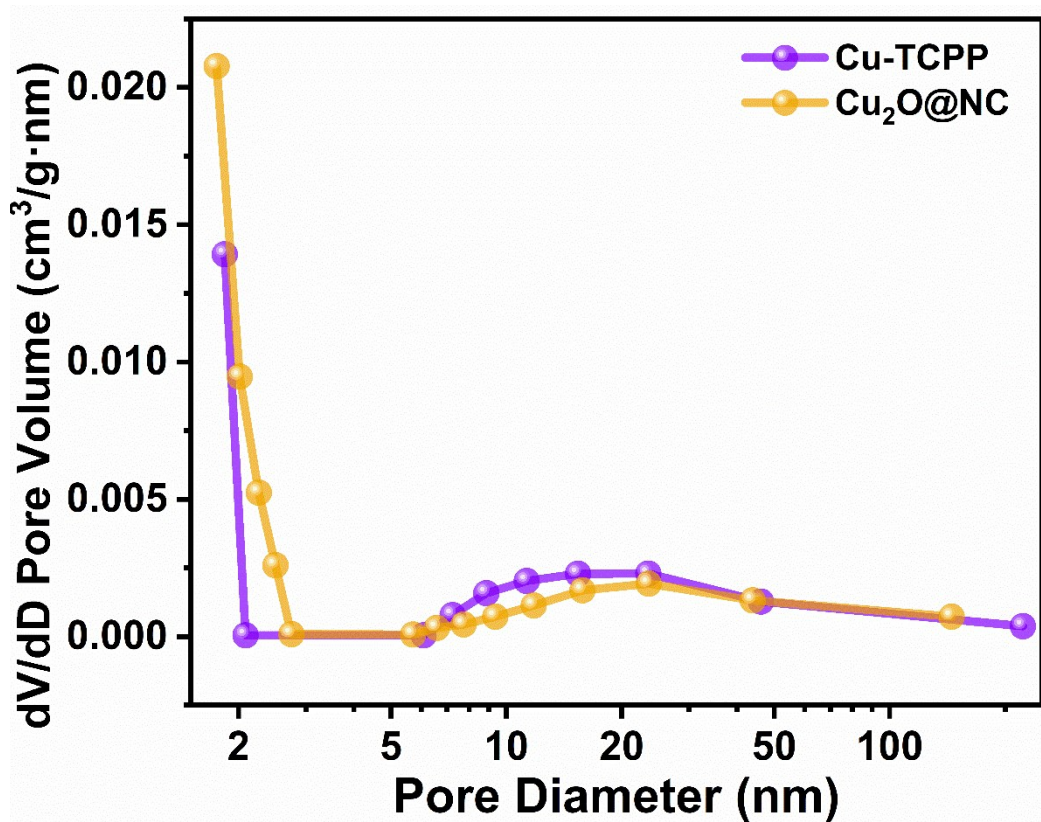

Figure S2. The pore size distribution of the Cu-TCPP and Cu<sub>2</sub>O@NC.

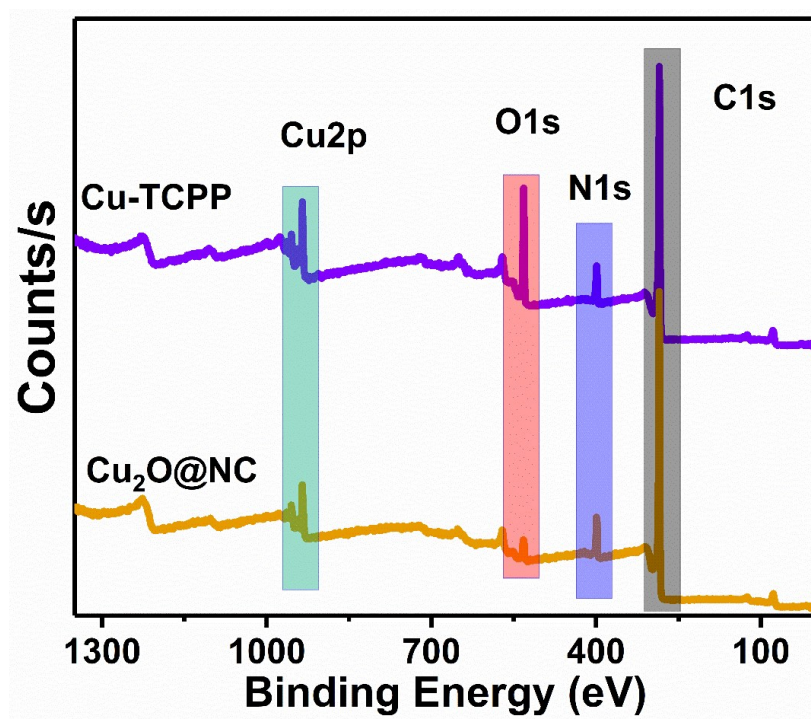

**Figure S3.** The XPS survey spectra of the Cu-TCPP and Cu<sub>2</sub>O@NC.

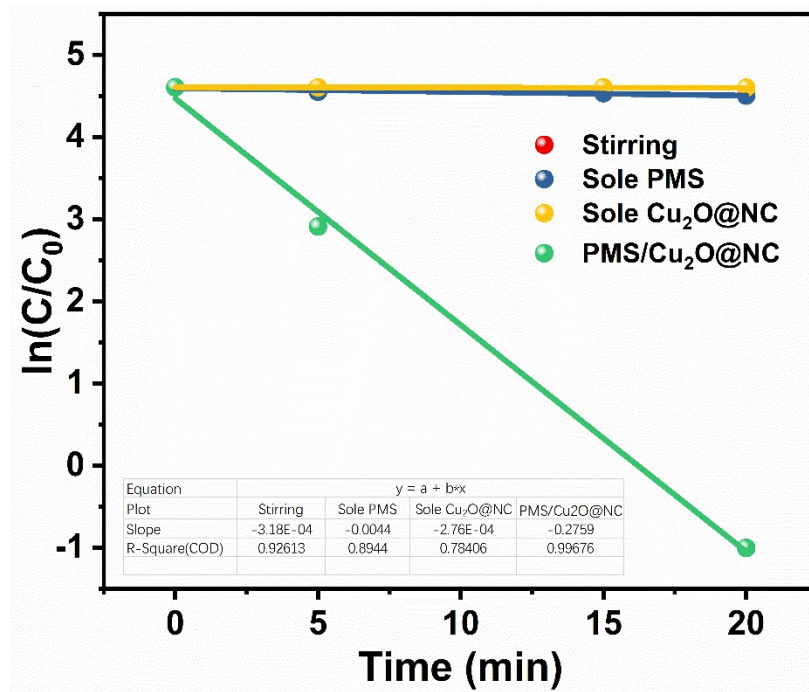

Figure S4. The  $k$  value calculation of the reaction.

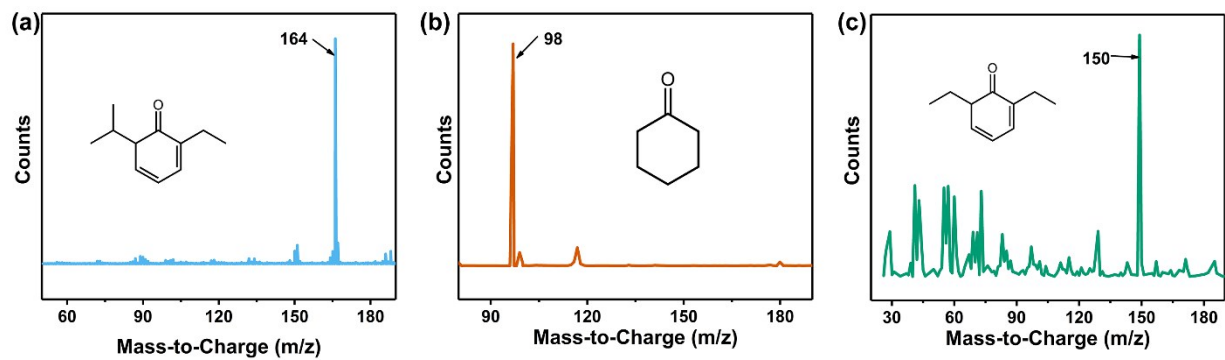

**Figure S5.** LC/GC-MS spectra of the byproducts of the propofol.
